# Supplementary material for: Zika Virus Persistence and Higher Viral Loads in Cutaneous Capillaries Than in Venous Blood
Source: PubMed Central journal article supplement (PMC5652410; doi:10.3201/eid2311.170337), 2017-11
Supplement: 17-0337-Techapp-s1.pdf [file 17-0337-Techapp-s1.pdf]

# Zika Virus Persistence and Higher Viral Loads in Cutaneous Capillaries Than in Venous Blood

## Technical Appendix

**Technical Appendix Table.** Kinetics of Zika virus load in venous and capillary blood samples from 21 patients, French Guiana, 2016\*

| Patient no. | Age, y | Sex | Day after symptom onset | Cycle threshold |       | Zika virus load, log <sub>10</sub> copies/mL |                 |
|-------------|--------|-----|-------------------------|-----------------|-------|----------------------------------------------|-----------------|
|             |        |     |                         | Venous blood    | Urine | Venous blood                                 | Capillary blood |
| 1           | 40     | M   | 3                       | 33.26           | 32.77 | 3.8                                          | NA              |
|             |        |     | 8                       |                 |       | <1.8                                         | 2.8†            |
| 2           | 45     | M   | 3                       | 33.26           | 32.77 | 2.8                                          | <1.8†           |
|             |        |     | 6                       |                 |       | 2.3                                          | <1.8†           |
|             |        |     | 7                       |                 |       | <1.8                                         | <1.8            |
| 3           | 59     | F   | 2                       | 36.75           | 34.02 | 2.6                                          | 3.9†            |
|             |        |     | 3                       |                 |       | <1.8                                         | 3.1†            |
|             |        |     | 5                       |                 |       | <1.8                                         | <1.8            |
|             |        |     | 10                      |                 |       | <1.8                                         | <1.8            |
| 4           | 34     | M   | 2                       | 38.01           | 28.41 | 2.2                                          | 3.7†            |
|             |        |     | 4                       |                 |       | <1.8                                         | <1.8            |
|             |        |     | 11                      |                 |       | <1.8                                         | <1.8            |
| 5           | 37     | M   | 1                       | 30.27           | 34.08 | 4.3                                          | 4.2             |
|             |        |     | 3                       |                 |       | <1.8                                         | 2.4             |
|             |        |     | 7                       |                 |       | <1.8                                         | 2.6             |
| 6           | 28     | F   | 4                       | 31.00           | NA    | 4.6                                          | NA              |
|             |        |     | 5                       |                 |       | 4.1                                          | 4.2             |
|             |        |     | 7                       |                 |       | <1.8                                         | 2.8             |
| 7           | 42     | M   | 2                       | 34.29           | 36.88 | 3.6                                          | 4.8†            |
|             |        |     | 3                       |                 |       | <1.8                                         | 3.5             |
|             |        |     | 5                       |                 |       | <1.8                                         | 2.7             |
|             |        |     | 8                       |                 |       | <1.8                                         | <1.8†           |
| 8           | 41     | F   | 3                       | Negative        | 29.00 | <1.8                                         | 3.7             |
| 9           | 34     | F   | 2                       | 36.92           | 35.00 | 2.9                                          | 3.1             |
|             |        |     | 7                       |                 |       | <1.8                                         | <1.8†           |
|             |        |     | 3                       |                 |       | 3.3                                          | 3.4†            |
| 10          | 41     | M   | 5                       | 35.35           | 33.63 | <1.8                                         | <1.8            |
|             |        |     | 10                      |                 |       | <1.8                                         | <1.8            |
|             |        |     | 2                       |                 |       | 36.64                                        | 30.17           |
| 11          | 35     | M   | 3                       | 36.64           | 30.17 | <1.8                                         | 2.6             |
|             |        |     | 5                       |                 |       | <1.8                                         | 2.5             |
|             |        |     | 8                       |                 |       | <1.8                                         | 2.4             |
|             |        |     | 3                       |                 |       | 34.16                                        | 32.9            |
| 12          | 39     | M   | 6                       | 34.16           | 32.9  | <1.8                                         | <1.8†           |
|             |        |     | 10                      |                 |       | <1.8                                         | <1.8†           |
|             |        |     | 3                       |                 |       | 36.97                                        | 27.63           |
| 13          | 39     | M   | 5                       | 36.97           | 27.63 | <1.8                                         | <1.8            |
|             |        |     | 10                      |                 |       | <1.8                                         | <1.8†           |
|             |        |     | 2                       |                 |       | 33.48                                        | 36.45           |
| 14          | 45     | M   | 3                       | 33.48           | 36.45 | <1.8                                         | 3.3†            |
|             |        |     | 6                       |                 |       | <1.8                                         | <1.8†           |
|             |        |     | 8                       |                 |       | <1.8                                         | <1.8†           |
|             |        |     | 1                       |                 |       | 33.96                                        | 29.27           |
| 15          | 46     | M   | 3                       | 33.96           | 29.27 | 3.1                                          | 3.5             |
|             |        |     | 5                       |                 |       | NA                                           | 3.8†            |
|             |        |     | 7                       |                 |       | 2.3                                          | 4.2             |
|             |        |     | 3                       |                 |       | 31.37                                        | 34.44           |
| 16          | 63     | F   | 8                       | 31.37           | 34.44 | <1.8                                         | <1.8            |
|             |        |     | 3                       |                 |       | <1.8                                         | 2.5             |
|             |        |     | 10                      |                 |       | <1.8                                         | <1.8            |

| Patient no. | Age, y | Sex | Day after symptom onset | Cycle threshold |       | Zika virus load, log <sub>10</sub> copies/mL |                 |
|-------------|--------|-----|-------------------------|-----------------|-------|----------------------------------------------|-----------------|
|             |        |     |                         | Venous blood    | Urine | Venous blood                                 | Capillary blood |
| 17          | 44     | M   | 2                       | 37.38           | 34.17 | 2.5                                          | 5.7†            |
|             |        |     | 3                       |                 |       | <1.8                                         | <1.8†           |
|             |        |     | 5                       |                 |       | <1.8                                         | <1.8†           |
|             |        |     | 7                       |                 |       | <1.8                                         | <1.8†           |
| 18          | 32     | F   | 1                       | 30.92           | 34.70 | 4.3                                          | NA              |
|             |        |     | 3                       |                 |       | 3.0                                          | 3.1†            |
|             |        |     | 7                       |                 |       | <1.8                                         | <1.8†           |
|             |        |     | 15                      |                 |       | <1.8                                         | <1.8            |
| 19          | 35     | M   | 4                       | Negative        | 36.56 | <1.8                                         | 3.8†            |
|             |        |     | 6                       |                 |       | <1.8                                         | 3.2†            |
|             |        |     | 8                       |                 |       | <1.8                                         | 3.7             |
|             |        |     | 18                      |                 |       | NA                                           | 1.9             |
| 20          | 41     | F   | 2                       | 31.99           | 37.00 | 4.1                                          | 4.4†            |
|             |        |     | 4                       |                 |       | <1.8                                         | 3.7†            |
|             |        |     | 7                       |                 |       | <1.8                                         | 3.6             |
|             |        |     | 14                      |                 |       | <1.8                                         | <1.8            |
| 21          | 35     | F   | 1                       | 34.91           | NA    | 3.4                                          | <1.8†           |
|             |        |     | 3                       |                 |       | <1.8                                         | <1.8†           |
|             |        |     | 6                       |                 |       | <1.8                                         | <1.8            |
|             |        |     | 13                      |                 |       | <1.8                                         | <1.8†           |

\*NA, not available; RT-PCR, reverse transcription PCR. Quantification was performed by real-time RT-PCR (RealStar Zika Virus RT-PCR Kit 1-0 CE; Altona Diagnostics GmbH, Hamburg, Germany) with a detection threshold of 1.8 log<sub>10</sub> copies/mL.  
†Volume of sample used for extraction was <50 µL.
